# Supplementary material
Source: Springer Nature journal article supplement (https://www.springermedizin.de/resource/supplementary/13256_2009_1383_MOESM2_ESM.pdf/9647780)

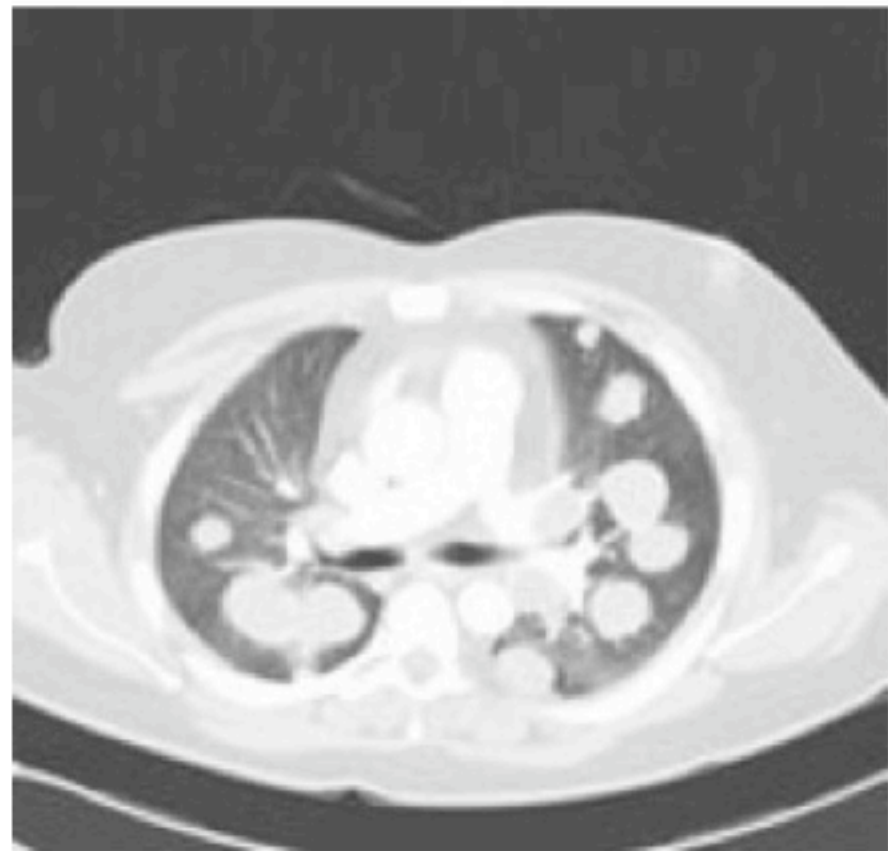

Fig 2a

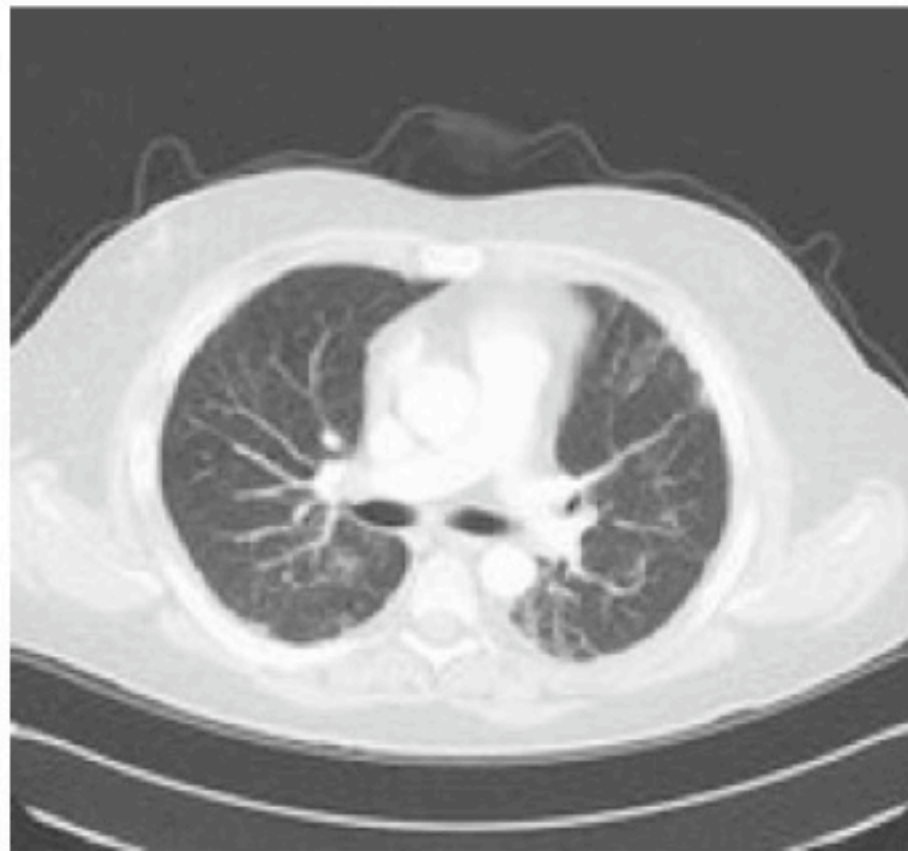

Fig 2b

Supplement: MOESM2 [file 9647780]
